# Supplementary figures and images for: Super-tough hydrogels from shape-memory polyurethane with wide-adjustable mechanical properties
Source: Springer Nature journal article supplement (doi:10.1007/s10853-016-0689-7), 2017-01-02

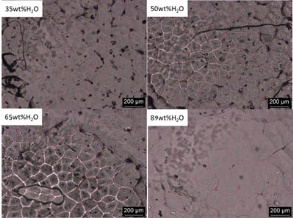


Figure S1 The on-line optical micrographs of the D6 hydrogels with different water contents

Supplement: MOESM1 [file 11969264]
